1 **Title**

2 **RefSoil+: A reference for antimicrobial resistance genes on soil plasmids**

3  
4 **Authors**

5 **TK Dunivin<sup>1,2</sup>, J Choi<sup>3</sup>, AC Howe<sup>3</sup> and A Shade<sup>1,4</sup>**

6  
7 1. Department of Microbiology and Molecular Genetics, Michigan State University, East  
8 Lansing MI 48840 USA

9 2. Environmental and Integrative Toxicological Sciences, Michigan State University, East  
10 Lansing MI 48840

11 3. Department of Agricultural and Biosystems Engineering, Iowa State University Ames, IA  
12 50011

13 4. Department of Plant, Soil and Microbial Sciences; Program in Ecology, Evolutionary  
14 Biology and Behavior; and the Plant Resilience Institute, Michigan State University, East  
15 Lansing, MI 48840

16  
17  
18  
19 **Abstract**

20 Plasmids harbor transferable genes that contribute to the functional repertoire of  
21 microbial communities, yet their contributions to metagenomes are often overlooked.  
22 Environmental plasmids have the potential to spread antibiotic resistance to clinical microbial  
23 strains. In soils, high microbiome diversity and high variability in plasmid characteristics present  
24 a challenge for studying plasmids. To improve understanding of soil plasmids, we present  
25 RefSoil+, a database containing plasmid sequences from 922 soil microorganisms. Soil plasmids  
26 were relatively larger than other described plasmids, which is a trait associated with plasmid  
27 mobility. There was no relationship between chromosome size and plasmid size or number,

28 suggesting that these genomic traits are independent in soil. Soil-associated plasmids, but not  
29 chromosomes, had fewer antibiotic resistance genes than other microorganisms. These data  
30 suggest that soils may offer limited opportunity for plasmid-mediated transfer of described  
31 antibiotic resistance genes. RefSoil+ can serve as a baseline for the diversity, composition, and  
32 host-associations of plasmid-borne functional genes in soil, a utility that will be enhanced as the  
33 database expands. Our study improves understanding of soil plasmids and provides a resource  
34 for assessing the dynamics of the genes that they carry, especially genes conferring antibiotic  
35 resistances.

36

37

## 38 **Importance**

39 Soil-associated plasmids have the potential to transfer antibiotic resistance genes from  
40 environmental to clinical microbial strains, which is a public health concern. A specific resource  
41 is needed to aggregate knowledge of soil plasmid characteristics so that the content, host-  
42 associations, and dynamics of antibiotic resistance genes can be assessed and then tracked  
43 between the environment and the clinic. Here, we present RefSoil+, a database of soil-associated  
44 plasmids. RefSoil+ presents a contemporary snapshot of antibiotic resistance genes in soil that  
45 can serve as a reference as novel plasmids and transferred antibiotic resistances are discovered.  
46 Our study broadens our understanding of plasmids in soil and provides a community resource for  
47 investigating clinic-environment dynamics of important plasmid-associated genes, including  
48 antibiotic resistance genes.

49

## 50 **Introduction**

51           Soil is a unique and ancient environment that harbors immense microbial biodiversity.  
52   The soil microbiome has functional consequences for ecosystems, like supporting plant growth  
53   (1, 2) and mediating key biogeochemical transformations (3). It also serves as a reservoir of  
54   microbial functional genes of interest to human and animal welfare. Within microbial genomes,  
55   important functions can be encoded on both chromosomes and extrachromosomal mobile genetic  
56   elements such as plasmids. Plasmids can be laterally transferred among community members,  
57   both among and between phyla (4–6). This causes propagation of plasmid functional genes and  
58   allows for them to spread among divergent host strains. Within microbial communities, plasmids  
59   influence microbial diversification (7) and contribute to functional gene pools (4). Plasmids can  
60   alter the fitness of organisms in a community as they can be gained or lost by environmental  
61   organisms, which alters their functional gene content and can have consequences for their local  
62   competitiveness.

63           Antibiotic resistance genes (ARGs) provide a prime example of the importance that  
64   functional genes encoded on plasmids can have. ARGs can undergo plasmid-mediated horizontal  
65   gene transfer (8, 9). There is particular concern about the potential for spread of ARGs between  
66   environmental and clinically-relevant bacterial strains. Studies of ARGs in soil have shown  
67   overlap between environmental and clinical strains that suggests HGT (10–12). For example,  
68   plasmid-encoded quinolone resistance (*qnrA*) in clinical Enterobacteriaceae strains likely  
69   originated from the environmental strain *Shewanella algae* (11). The extent of the impact of  
70   environmental reservoirs of ARGs is unknown (13), but studies have shown evidence for  
71   predominantly vertical, rather than horizontal, transfer of these genes (14). Additionally, it is  
72   speculated that rates of transfer in bulk soil are low compared to environments with higher  
73   population densities such as the rhizosphere, phyllosphere, and gut microbiomes of soil

74 organisms (15). In the case of antibiotic resistance, mobilization is a public health risk. Broadly,  
75 the ability of plasmids to rapidly move genes both between and among membership is linked to  
76 diversification in complex systems, especially soils (7).

77 Despite their ecological and functional relevance, plasmids are not well characterized in  
78 soil. Plasmids vary in copy number, host range, transfer potential, and genetic makeup (4, 16),  
79 making them difficult to assemble and characterize from complex soil metagenomes that contain  
80 tens of thousands of bacteria and archaea (17). To aid in the study of plasmid-mediated transfer  
81 of functional genes in soil, we establish a resource to compare genetic locations of functional  
82 genes in soil organisms. We extended the RefSoil database (18) of 922 soil microorganisms to  
83 include their plasmids. We used this database to test whether soil-associated plasmids are distinct  
84 from plasmids from a broad, general database of microorganisms, RefSeq (19). We focused our  
85 comparisons on the content, diversity, and location of ARGs on plasmids and chromosomes. We  
86 used hidden markov models to search for clinically and agriculturally relevant ARGs in the  
87 extended soil database, RefSoil+, and RefSeq. RefSoil+ provides insights into the range of  
88 plasmid sizes and their functional potential within soil microorganisms. RefSoil+ can be used to  
89 inform and test hypotheses about the traits, functional gene content, and spread of soil-associated  
90 plasmids and can serve as a reference for plasmid assembly from metagenomes.

91

## 92 **Results and discussion**

### 93 *Plasmid characterization*

94 RefSoil+ is a database of soil-associated plasmids as an extension of RefSoil, which  
95 includes taxonomic information, amino acid sequences, coding nucleotide sequences, and  
96 GenBank files for a curated set of 922 soil-associated organisms. A total of 927 plasmids were

97 associated with RefSoil organisms, and 370 RefSoil organisms (40.1%) had at least one plasmid  
98 (**Figure 1A**). This is high compared to the proportion of non-eukaryotic plasmids in the general  
99 RefSeq database (20%). The mean number of plasmids per RefSoil organism was 1.01, but the  
100 number of plasmids per organism varied greatly (**Figure 1B**). For example, strain *Bacillus*  
101 *thuringiensis* serovar *thuringiensis* (RefSoil 738) had 14 plasmids, ranging from 6,880 to  
102 328,151 bp. The abundance of plasmids found in RefSoil genomes highlights plasmids as an  
103 important component of soil microbiomes (7, 20).

104         Soil-associated plasmids tended to be larger than plasmids from other environments.  
105 RefSoil plasmids contained > 195,000 kbp and increased the number of base pairs included in  
106 RefSoil by 4.4%. Plasmid size in RefSoil organisms ranged from 1,286 bp to 2.58 Mbp (**Figure**  
107 **2A**), which rivals the range of all known plasmids from various environments (744 bp – 2.58  
108 Mbp) (16). In the distribution of plasmid size, both upper and lower extremes had representatives  
109 from soil. Plasmids from all habitats had a characteristic bimodal size distribution with peaks at 5  
110 kb and 35 kb (15–17). Soil-associated plasmids in RefSoil+, however, trended larger and did not  
111 have many representatives in the lower size range (**Figure 2**). Specifically, RefSoil+  
112 proportionally contained more plasmids > 100 kb (**Figure 2B**, Mann-Whitney U test  $p < 0.001$ ).  
113 Thus, while soil-associated plasmids vary in size, they are, on average, large. This is of particular  
114 importance because of the established differences in mobility of plasmids in different size ranges  
115 (5). Mobilizable plasmids, which have relaxases, tend to be larger than non-transmissible  
116 plasmids, with median values of 35 and 11 kbp respectively (5). The majority of soil-associated  
117 plasmids were > 35 kbp (**Figure 2**), suggesting they are more likely to be mobile. Additionally,  
118 conjugative plasmids, which encode type IV coupling proteins, have a larger median size (181  
119 kbp) (5). The median size of soil-associated plasmids was 91 kbp (**Figure 2**), suggesting that

120 these soil-associated plasmids are more likely to be conjugative. Future works should examine  
121 genetic potential for transfer of plasmids associated with different ecosystems to test this  
122 hypothesis.

123 Genome size, inclusive of chromosomes and plasmids, is an important ecological trait  
124 that is difficult to estimate from metagenomes (24). Due to incomplete assemblies, genome size  
125 must be approximated based on the estimated number of organisms through single-copy gene  
126 abundance (25). Extrachromosomal elements, however, inflate these estimated genome sizes  
127 because they contribute to the sequence information of the metagenome often without  
128 contributing single-copy genes (26). While our methodologies do not account for plasmid copy  
129 number (27), we examined the relationship between genome size and plasmid size in soil-  
130 associated organisms, and found none (**Figure 3**). Additionally, chromosome size was not  
131 predictive of the number of plasmids (**Figure 3; Figure S1**). For example, *Bacillus thuringiensis*  
132 subsp. *thuringiensis* Strain IS5056 had the most plasmids in RefSoil+, but these plasmids  
133 spanned the size range of 6.8 - 328 kbp. This strain's plasmids make up 19% of its coding  
134 sequences (28), but its chromosome (5.4 Mbp) is average for soils (26). Despite that there is no  
135 clear relationship between genome size and plasmid characteristics within these data, the plasmid  
136 database can be used to inform estimates of average genome sizes from close relatives detected  
137 within metagenomes.

138

### 139 *ARGs in soil plasmids*

140 It is unclear whether soil ARGs are predominantly on chromosomes or mobile genetic  
141 elements. While mobile gene pools are not static, there is evidence to suggest low transfer of  
142 ARGs in soil (14, 15, 29). For example, bulk soils are not a “hot spot” for HGT because they are

143 often resource-limited (30), and surveys of ARGs in soil metagenomes have suggested a  
144 predominance of vertical transfer, rather than horizontal transfer, of ARGs (14, 29). Using  
145 RefSoil+, we examined 36 genes encoding resistance to beta-lactams, tetracyclines,  
146 aminoglycosides, chloramphenicol, vancomycin, sulfonamides, macrolides, and trimethoprim  
147 (29). After quality filtering, we detected 3,217 ARGs in RefSoil chromosomes and plasmids  
148 (**Figure 4; Table S1**).

149 Adding plasmids to the RefSoil database increased functional genes in the database, as  
150 128 ARG sequences were only detected on plasmids (**Figure 4C**). These functional genes would  
151 be missed if only chromosomes were considered. With the exception of sulfonamides, the  
152 majority of ARGs were chromosomally encoded in soils (**Figure 4AB**). We examined the  
153 genomic distributions of ARGs in RefSoil+ based on taxonomy (**Figure S3**). Proteobacteria had  
154 the most plasmid-associated ARGs, which has been reported previously (31). ARGs were found  
155 on chromosomes more often than plasmids, but we were curious whether this phenomenon was  
156 specific to soil. Therefore, we compared ARG content in RefSoil to all other known plasmids  
157 (RefSeq database;  $n = 9,132$ , (19)) and found that the number of ARGs per genome was  
158 comparable for RefSoil and RefSeq, but RefSoil plasmids had proportionally fewer ARGs than  
159 RefSeq plasmids (**Figure S4**; Mann-Whitney U test  $p$ -value = 0.002). This suggests that  
160 plasmid-mediated HGT rates of ARGs may be relatively low in these soil organisms. We note  
161 that the RefSoil database is limited in representatives of Verrucomicrobia and Acidobacteria  
162 which may change these estimates (18); however, this will improve as the database grows. We  
163 examined this trend for each gene individually and still observed a greater proportion of ARG  
164 sequences on plasmids in RefSeq compared with RefSoil+ with one exception, ANT9 which  
165 encodes a Streptomycin 3'-adenylyltransferase (**Figure 5**). Additionally, 12 genes (ANT3, CEP,

166 *dfra1, ermB, intI, qnr, repA, strA, strB, sul2, tetD, vanZ*) were more common on plasmids in  
167 RefSeq compared to only 3 genes (*CEP, dfra1, repA*) in RefSoil+ (**Figure 5**). Thus, these soil  
168 bacteria harbor relatively fewer ARGs on plasmids, suggesting that RefSoil+ organisms have  
169 limited capacity for plasmid-mediated transfer of these genes. These data represent a baseline of  
170 ARGs present on chromosomes and plasmids in soil microorganisms. This is important because  
171 some data suggest that soil ARGs are increasing over time due to increased antibiotic exposure  
172 (32). Future assessments of functional gene content on chromosomes and plasmids together will  
173 help to delineate changes in transfer potential and reveal selective or environmental factors that  
174 impact transfer potential.

175 We examined the abundance of ARGs in RefSoil+ and RefSeq strains and asked whether  
176 these ARGs were more commonly detected on chromosomes or plasmids. Gibson and colleagues  
177 (2015) compared soil-associated isolates with water and human-associated strains and found an  
178 abundance of genes encoding multidrug efflux pumps and beta lactam resistance but not  
179 tetracycline resistance in soil (33). This was also observed in our analysis (**Figure 5**). By  
180 determining whether ARGs were encoded on plasmids or chromosomes, we were also able to  
181 show that these patterns were due to chromosomal genes and more likely vertically transferred  
182 (**Figure 5**). While genome data from isolates cannot speak to environmental abundance of  
183 ARGs, our data support observations of ARGs in mobile genetic elements in soil from  
184 cultivation-independent studies as well. Luo and colleagues (2016) observed a low abundance of  
185 chloramphenicol, quinolone, and tetracycline resistance genes in soil mobile genetic elements  
186 (20), and Xiong and colleagues (2015) also observed low abundance of *qnr* genes in a soil  
187 mobile genetic elements (34). While plasmids are not the sole mobile genetic element, we  
188 observed fewer plasmid-encoded chloramphenicol, quinolone, and tetracycline resistance genes



189 in soil-associated microorganisms than RefSeq microorganisms (**Figure 5**). Mobile genetic  
190 elements in soil have also been shown to have an abundance of genes encoding multidrug efflux  
191 pumps and resistance to beta-lactams, aminoglycosides, and glycopeptides (20). While we  
192 detected genes encoding aminoglycoside and beta-lactam resistance and multi drug efflux pumps  
193 in RefSoil+, we observed lower counts on plasmids as compared with chromosomes (**Figure 4**;  
194 **Figure 5**). Additionally, we did not detect plasmid-borne vancomycin resistance genes, despite  
195 that environmental samples have shown vancomycin resistance genes on mobile genetic  
196 elements (20). Though all isolate databases are biased by common cultivation conditions, these  
197 data point to gaps in our soil collections with a specific eye towards representation of plasmid  
198 content.

199

#### 200 *RefSoil+ applications*

201 Plasmid assembly tools rely on existing databases to assemble plasmids from metagenomes  
202 (35, 36), but this work shows that soil-associated plasmids are distinct. While this RefSoil+ is  
203 biased towards cultured strains, characterization of known plasmids is essential to improve  
204 detection of novel plasmids (21). This database of soil-associated plasmids expands knowledge  
205 of functional genes with potential for transfer in soil microbiomes, highlights the contribution of  
206 plasmids to metagenome-estimated genome size, offers insights into plasmid host ranges in soil,  
207 and serves as a reference for future works.

208 Host taxonomy can be observed in RefSoil+ because it is populated by the chromosomes and  
209 plasmids of isolates. While RefSoil+ does not predict plasmid presence or gene content in the  
210 environment, annotation of cultivable organisms with plasmids is important for soil systems  
211 because traditional methods of assembly and annotation from metagenomes allows only for

212 coarse estimation of host identity (35, 37). Plasmid gene content is not static (38), and organisms  
213 can gain or lose plasmids (39, 40). Despite this, historical data of the genetic makeup and host  
214 range of plasmids can be used to better understand plasmid ecology, and to serve as an important  
215 reference to understand by how much host plasmid numbers and contents changes in the future.

216 RefSoil+ can be used to better target plasmids in the environment, whether it is used as a  
217 reference database or as a database for primer design. New microbiome sequencing techniques  
218 such as Hi-C sequencing (41), long-read technology (42), or single cell sequencing (43) could  
219 add to and leverage RefSoil+ to improve characterization of plasmid-host relationships in soil.  
220 As movement of ARGs are observed in the clinic and the environment, RefSoil+ can also serve  
221 as a reference for comparison with legacy plasmid and chromosome content and distributions.  
222 Novel genomes and plasmids could be added in future RefSoil+ versions, and plasmid-host  
223 relationships as well as encoded functions could be compared between cultivation-dependent and  
224 –independent methodologies. RefSoil+ provides a resource for research frontiers in plasmid  
225 ecology and evolution within wild microbiomes.

226

## 227 **Materials and methods**

### 228 *Data availability*

229 All data and workflows are publicly available on GitHub  
230 ([github.com/ShadeLab/RefSoil\\_plasmids](https://github.com/ShadeLab/RefSoil_plasmids)). A table of all RefSoil organisms with genome and  
231 plasmid accession numbers is available in **Table S2** and GitHub in the DATABASE\_plasmids  
232 repository. This repository also hosts amino acid and nucleotide sequences for RefSoil+ genomes  
233 and plasmids. Plasmid retrieval workflows are included in the BIN\_retrieve\_plasmids directory.

234 All workflows are included on Github as well in the ANALYSIS\_antibiotic\_resistance  
235 repository.

236

### 237 *RefSoil plasmid database generation*

238 Accession numbers from RefSoil genomes were used to collect assembly accession  
239 numbers for all 922 strains. Assembly accession numbers were then used to obtain a list of all  
240 genetic elements from the assembly of one strain. Plasmid accession numbers were compiled for  
241 each strain and added to the RefSoil database to make RefSoil+ (**Table S1**). Plasmid accession  
242 numbers were used to download amino acid sequences, coding nucleotide sequences, and  
243 GenBank files. To ease comparisons between genome and plasmid sequence information,  
244 sequence descriptors for plasmid protein sequences were adjusted to mirror the format used for  
245 bacterial and archaeal RefSoil files.

246

### 247 *Accessing RefSeq genomes and plasmids*

248 Complete RefSeq genomes and plasmids were downloaded from NCBI to compare with  
249 RefSoil. All RefSeq bacteria and archaea protein sequences were downloaded from release 89  
250 (<ftp://ftp.ncbi.nlm.nih.gov/refseq/release>). All GenBank files for complete RefSeq assemblies  
251 were downloaded from NCBI. A total of 10,270 bacterial and 259 archaeal assemblies were  
252 downloaded. GenBank files were used to extract plasmid size and to compile a list of  
253 chromosomal and plasmid accession numbers. GenBank information was read into R and  
254 accession numbers for plasmids and chromosomes were separated. Additionally, all RefSoil  
255 accession numbers were removed from the RefSeq accession numbers. Ultimately, 10,359  
256 chromosome and 9,132 plasmid accession numbers were collected to represent non-RefSoil

257 plasmids. Protein files were downloaded and tidied using the protocol for RefSoil plasmids as  
258 described above.

259

### 260 *Plasmid characterization*

261 We summarized the RefSoil+ and RefSeq plasmids in several ways. Plasmid size was  
262 extracted from GenBank files for each RefSoil genome and plasmid. For comparison, size was  
263 also extracted from RefSeq plasmids. These data were compiled and analyzed in the R statistical  
264 environment for computing (44). The RefSoil metadata (**Table S1**), which contains host  
265 information for each plasmid, was used to calculate proportions of RefSoil organisms with  
266 plasmids. Both the number of plasmids per organism and the number of RefSoil organisms with  
267 one plasmid were examined.

268

### 269 *Antibiotic resistance gene detection*

270 We examined 36 clinically-relevant ARGs in RefSoil+, including *AAC6-Ia*, *adeB*, *ANT3*,  
271 *ANT6*, *ANT9*, *blaA*, *blaB*, *blaC*, *CAT*, *cmlA*, *dfra1*, *dfra12*, *ermB*, *ermC*, *intI*, *mexC*, *mexE*, *qnr*,  
272 *repA*, *strA*, *strB*, *sul2*, *tetA*, *tetD*, *tetM*, *tetQ*, *tetW*, *tetX*, *tolC*, *vanA*, *vanC*, *vanH*, *vanT*, *vanW*,  
273 *vanX*, and *vanZ*. For each gene of interest, hidden Markov models were downloaded from the  
274 FunGene database (45), which includes some models from the Resfam database (33). We then  
275 used these models to search amino acid sequence data from RefSoil genomes and plasmids with  
276 a publicly available, custom script and HMMER (46). To perform the search, *hmmsearch* (46)  
277 was used with an e-value cutoff of  $10^{-10}$ . These steps were repeated for protein sequence data  
278 from the complete RefSeq database (accessed 24 July 2018). Tabular outputs from both datasets  
279 were analyzed in R. Quality scores and percent alignments were plotted to determine quality

280 cutoff values for each gene (**Figure S2**). All final hits were required to be within 10% of the  
281 model length and to have a score of at least 40% of the maximum score for that gene. Based on  
282 quality distributions and GenBank function assignments, additional quality filtering by score was  
283 applied to genes *adeB*, *CEP*, *vanA*, *vanC*, *vanH*, *vanX*, and *vanW*. When one amino acid  
284 sequence was annotated twice (i.e. for similar genes), the hit with the lower score was discarded.  
285 The final, quality filtered hits were used to plot the distribution of ARGs in RefSoil genomes and  
286 plasmids.

287

288 **Acknowledgements.** AS acknowledges support in part from the National Science Foundation  
289 under Grants DEB #1655425 and DEB#1749544, from the USDA National Institute of Food and  
290 Agriculture and Michigan State AgBioResearch, and from the Great Lakes Bioenergy Research  
291 Center U.S. Department of Energy, Office of Science, Office of Biological and Environmental  
292 Research under Award number DE-SC0018409. TKD acknowledges support from the Michigan  
293 State University Department of Microbiology and Molecular Genetics Russell B. DuVall  
294 Fellowship. We thank the Jim Cole and the Ribosomal Database Project for helpful feedback on  
295 the work.

296

297

298

## 299 **References**

- 300 1. Glick BR. 1995. The enhancement of plant growth by free-living bacteria. *Can J*  
301 *Microbiol* 41:109–117.
- 302 2. Hu J, Wei Z, Friman VP, Gu SH, Wang XF, Eisenhauer N, Yang TJ, Ma J, Shen QR, Xu  
303 YC, Jousset A. 2016. Probiotic diversity enhances rhizosphere microbiome function and  
304 plant disease suppression. *MBio* 7:1–8.
- 305 3. Falkowski PG, Fenchel T, Delong EF. 2008. The Microbial Engines That Drive Earth's  
306 Biogeochemical Cycles. *Science* (80- ).
- 307 4. Smalla K, Jechalke S, Top EM. 2015. Plasmid detection, characterization and ecology.  
308 *Cancer* 121:1265–1272.
- 309 5. Smillie C, Garcillan-Barcia MP, Francia M V., Rocha EPC, de la Cruz F. 2010. Mobility  
310 of Plasmids. *Microbiol Mol Biol Rev* 74:434–452.
- 311 6. Aminov RI. 2011. Horizontal gene exchange in environmental microbiota. *Front*  
312 *Microbiol* 2:1–19.
- 313 7. Heuer H, Smalla K. 2012. Plasmids foster diversification and adaptation of bacterial  
314 populations in soil. *FEMS Microbiol Rev* 36:1083–1104.

- 315 8. Van Hoek AHAM, Mevius D, Guerra B, Mullany P, Roberts AP, Aarts HJM. 2011.  
316 Acquired antibiotic resistance genes: An overview. *Front Microbiol* 2:1–27.
- 317 9. Sentchilo V, Mayer AP, Guy L, Miyazaki R, Green Tringe S, Barry K, Malfatti S,  
318 Goessmann A, Robinson-Rechavi M, van der Meer JR. 2013. Community-wide plasmid  
319 gene mobilization and selection. *ISME J* 7:1173–86.
- 320 10. Forsberg KJ, Reyes A, Wang B, Selleck EM, Sommer MO, Dantas G. 2012. The shared  
321 antibiotic resistome of soil bacteria and human pathogens. *Science* (80- ) 337:1107–1111.
- 322 11. Poirel L, Liard A, Nordmann P, Mammeri H. 2005. Origin of Plasmid-Mediated  
323 Quinolone Resistance Determinant QnrA. *Antimicrob Agents Chemother* 49:3523–3525.
- 324 12. Patel R, Piper K, Cockerill FR, Steckelberg JM, Yousten AA. 2000. The biopesticide  
325 *Paenibacillus popilliae* has a vancomycin resistance gene cluster homologous to the  
326 enterococcal VanA vancomycin resistance gene cluster. *Antimicrob Agents Chemother*  
327 44:705–709.
- 328 13. Finley RL, Collignon P, Larsson DGJ, McEwen SA, Li X-Z, Gaze WH, Reid-Smith R,  
329 Timinouni M, Graham DW, Topp E. 2013. The Scourge of Antibiotic Resistance: The  
330 Important Role of the Environment. *Clin Infect Dis* 57:704–710.
- 331 14. Forsberg KJ, Patel S, Gibson MK, Lauber CL, Fierer N, Dantas G. 2014. Bacterial  
332 phylogeny structures soil resistomes across habitats. *Nature* 509:612–616.
- 333 15. van Elsas JD, Bailey MJ. 2002. The ecology of transfer of mobile genetic elements. *FEMS*  
334 *Microb Ecol* 42:187–197.
- 335 16. Thomas CM, Nielsen KM. 2005. Mechanisms of, and barriers to, horizontal gene transfer  
336 between bacteria. *NatRevMicrobiol* 3:711–721.
- 337 17. Schloss PD, Girard RA, Martin T, Edwards J, Thrash JC. 2016. Status of the archaeal and  
338 bacterial census: An update. *MBio* 7:1–10.
- 339 18. Choi J, Yang F, Stepanauskas R, Cardenas E, Garoutte A, Williams R, Flater J, Tiedje JM,  
340 Hofmockel KS, Gelder B, Howe A. 2017. Strategies to improve reference databases for  
341 soil microbiomes. *ISME J*.
- 342 19. O’Leary NA, Wright MW, Brister JR, Ciuffo S, Haddad D, McVeigh R, Rajput B,  
343 Robbertse B, Smith-White B, Ako-Adjei D, Astashyn A, Badretdin A, Bao Y, Blinkova  
344 O, Brover V, Chetvermin V, Choi J, Cox E, Ermolaeva O, Farrell CM, Goldfarb T, Gupta  
345 T, Haft D, Hatcher E, Hlavina W, Joardar VS, Kodali VK, Li W, Maglott D, Masterson P,  
346 McGarvey KM, Murphy MR, O’Neill K, Pujar S, Rangwala SH, Rausch D, Riddick LD,  
347 Schoch C, Shkeda A, Storz SS, Sun H, Thibaud-Nissen F, Tolstoy I, Tully RE, Vatsan  
348 AR, Wallin C, Webb D, Wu W, Landrum MJ, Kimchi A, Tatusova T, DiCuccio M, Kitts  
349 P, Murphy TD, Pruitt KD. 2016. Reference sequence (RefSeq) database at NCBI: Current  
350 status, taxonomic expansion, and functional annotation. *Nucleic Acids Res* 44:D733–  
351 D745.
- 352 20. Luo W, Xu Z, Riber L, Hansen LH, Sørensen SJ. 2016. Diverse gene functions in a soil  
353 mobilome. *Soil Biol Biochem* 101:175–183.
- 354 21. Shintani M, Sanchez ZK, Kimbara K. 2015. Genomics of microbial plasmids:  
355 Classification and identification based on replication and transfer systems and host  
356 taxonomy. *Front Microbiol* 6:1–16.
- 357 22. Garcillán-Barcia MP, Alvarado A, De la Cruz F. 2011. Identification of bacterial plasmids  
358 based on mobility and plasmid population biology. *FEMS Microbiol Rev* 35:936–956.
- 359 23. Li L-G, Xia Y, Zhang T. 2017. Co-occurrence of antibiotic and metal resistance genes  
360 revealed in complete genome collection. *ISME J* 11:651–662.

- 361 24. Beszteri B, Temperton B, Frickenhaus S, Giovannoni SJ. 2010. Average genome size: a  
362 potential source of bias in comparative metagenomics. *ISME J*.
- 363 25. Nayfach S, Pollard KS. 2015. Average genome size estimation improves comparative  
364 metagenomics and sheds light on the functional ecology of the human microbiome.  
365 *Genome Biol* 16.
- 366 26. Sorensen JW, Dunivin TK, Tobin TC, Shade A, (in review) . Ecological selection for  
367 small microbial genomes along a temperate-to-thermal soil gradient. *bioRxiv*.
- 368 27. Lee C, Kim J, Shin SG, Hwang S. 2006. Absolute and relative QPCR quantification of  
369 plasmid copy number in *Escherichia coli*. *J Biotechnol* 123:273–280.
- 370 28. Murawska E, Fiedoruk K, Bideshi DK, Swiecicka I. 2013. Complete Genome Sequence of  
371 *Bacillus thuringiensis* subsp. *thuringiensis* Strain IS5056, an Isolate Highly Toxic to  
372 *Trichoplusia ni*. *Genome Announc* 1:e00108-13-e00108-13.
- 373 29. Dunivin TK, Shade A. 2018. Community structure explains antibiotic resistance gene  
374 dynamics over a temperature gradient in soil. *FEMS Microbiol Ecol* 94.
- 375 30. Sørensen SJ, Bailey M, Hansen LH, Kroer N, Wuertz S, Sorensen SJ, Bailey M, Hansen  
376 LH, Kroer N, Wuertz S. 2005. Studying plasmid horizontal transfer in situ: a critical  
377 review. *Nat Rev Microbiol* 3:700–710.
- 378 31. Pal C, Bengtsson-Palme J, Kristiansson E, Larsson DGJ. 2015. Co-occurrence of  
379 resistance genes to antibiotics, biocides and metals reveals novel insights into their co-  
380 selection potential. *BMC Genomics*.
- 381 32. Knapp CW, Dolfing J, Ehlert PA, Graham DW. 2010. Evidence of Increasing Antibiotic  
382 Resistance Gene Abundances in Archived Soils since 1940. *Environ Sci Technol* 44:580–  
383 587.
- 384 33. Gibson MK, Forsberg KJ, Dantas G. 2014. Improved annotation of antibiotic resistance  
385 determinants reveals microbial resistomes cluster by ecology. *ISME J* 9:1–10.
- 386 34. Musovic S, Klümper U, Dechesne A, Magid J, Smets BF. 2014. Long-term manure  
387 exposure increases soil bacterial community potential for plasmid uptake. *Environ*  
388 *Microbiol Rep* 6:125–130.
- 389 35. Krawczyk PS, Lipinski L, Dziembowski A. 2018. PlasFlow: predicting plasmid sequences  
390 in metagenomic data using genome signatures. *Nucleic Acids Res* 46.
- 391 36. Rozov R, Brown Kav A, Bogumil D, Shterzer N, Halperin E, Mizrahi I, Shamir R. 2016.  
392 *Recycler*: an algorithm for detecting plasmids from *de novo* assembly graphs.  
393 *Bioinformatics*.
- 394 37. Beaulaurier J, Zhu S, Deikus G, Mogno I, Zhang XS, Davis-Richardson A, Canepa R,  
395 Triplett EW, Faith JJ, Sebra R, Schadt EE, Fang G. 2018. Metagenomic binning and  
396 association of plasmids with bacterial host genomes using DNA methylation. *Nat*  
397 *Biotechnol* 36:61–69.
- 398 38. Jechalke S, Broszat M, Lang F, Siebe C, Smalla K, Grohmann E. 2015. Effects of 100  
399 years wastewater irrigation on resistance genes, class 1 integrons and IncP-1 plasmids in  
400 Mexican soil. *Front Microbiol* 6:1–10.
- 401 39. Smalla K, Haines AS, Jones K, Krögerrecklenfort E, Heuer H, Schloter M, Thomas CM.  
402 2006. Increased abundance of IncP-1 $\beta$  plasmids and mercury resistance genes in mercury-  
403 polluted river sediments: First discovery of IncP-1 $\beta$  plasmids with a complex mer  
404 transposon as the sole accessory element. *Appl Environ Microbiol* 72:7253–7259.
- 405 40. Riber L, Burmolle M, Alm M, Milani SM, Thomsen P, Hansen LH, Sørensen SJ. 2016.  
406 Enhanced plasmid loss in bacterial populations exposed to the antimicrobial compound



- 407 irgasan delivered from interpenetrating polymer network silicone hydrogels. *Plasmid* 87–  
408 88:72–78.
- 409 41. Burton JN, Liachko I, Dunham MJ, Shendure J. 2014. Species-Level Deconvolution of  
410 Metagenome Assemblies with Hi-C–Based Contact Probability Maps. *G3&#58;  
411 Genes|Genomes|Genetics* 4:1339–1346.
- 412 42. White RA, Callister SJ, Moore RJ, Baker ES, Jansson JK. 2016. The past, present and  
413 future of microbiome analyses. *Nat Protoc* 11:2049–2053.
- 414 43. Stepanauskas R. 2015. Wiretapping into microbial interactions by single cell genomics.  
415 *Front Microbiol* 6:2014–2016.
- 416 44. R Core Team. 2017. R: A Language and Environment for Statistical Computing. Vienna,  
417 Austria.
- 418 45. Fish JA, Chai B, Wang Q, Sun Y, Brown CT, Tiedje JM, Cole JR. 2013. FunGene: The  
419 functional gene pipeline and repository. *Front Microbiol*.
- 420 46. Johnson L, Eddy S, Portugaly E. 2011. Hidden Markov Model Speed Heuristic and  
421 Iterative HMM Search Procedure. *BMC Bioinformatics* 39.
- 422  
423

#### 424 **Table and Figure legends**

425  
426 **Figure 1. Summary of RefSoil plasmids. A)** Percentage of RefSoil microorganisms with (blue)  
427 and without (green) detected plasmids. **B)** Distribution of the number of plasmids per  
428 RefSoil microorganism.

429

430 **Figure 2. Plasmid size distributions. A)** Histogram of plasmid size (kbp) from RefSoil  
431 plasmids. **B)** RefSoil (blue) and RefSeq (gray) plasmid size distributions.

432

433 **Figure 3. Relationship between plasmid size and genome size.** Total plasmid size (sum of all  
434 plasmids in an microorganism, kbp) is plotted on a log scale against total genome size for  
435 each RefSoil microorganism. Density plots are included for each axis to represent the  
436 distribution of RefSoil microorganisms with different numbers of plasmids (none (green),  
437 one (blue), or multiple (purple)).

438

439 **Figure 4. Distribution of ARGs in RefSoil genomes and plasmids. A)** The proportion of



440 ARGs on plasmids (light blue), genomes (green) or both (dark blue) in RefSoil+  
441 microorganisms. **B)** The raw numbers of detected ARGs. Bars are colored by location of  
442 genomic element (as in panel A) and categorized by antibiotic resistance gene group. The  
443 number of genes included in each group is shown in parentheses. **C)** A table with the  
444 number different ARGs that were only found on plasmids. Genes are ordered by ranked  
445 abundance.

446

447 **Figure 5. Proportion of genes on genomes and plasmids in RefSoil+ and RefSeq databases.**

448 Number of ARGs was normalized to number of genetic elements. Bars are colored by  
449 genetic element

450

451 **Figure S1. Relationship between plasmid number and genome size.** Boxplots showing the

452 distribution of genome sizes based on the number of plasmids. Numbers above boxplots

453 show the number of organisms in that category. P-value from an ANOVA is also shown.

454

455 **Figure S2. Quality of RefSoil+ ARG hits.** Percent alignment was plotted against the score for

456 each ARG hit for quality filtering purposes.

457

458 **Figure S3. Distribution of ARGs in RefSoil chromosomes and plasmids by taxonomy.** The

459 number of detected ARGs were normalized to the number of RefSoil organisms in each

460 phylum and Proteobacteria class. ARG hits are colored by genetic location. The number of

461 taxa included in each phylum is shown in parentheses.

462

463 **Figure S4. Proportion of ARGs in RefSoil and RefSeq databases.** Boxplots of the proportion  
464 of ARGs per genetic element. Each ARG was normalized to the number of genetic  
465 elements in the database. Points are colored by ARG category, and P-values for Mann-  
466 Whitney U test are 0.55 (n.s. is not significant) and 0.007 (\*\*) for chromosomes and  
467 plasmids respectively.

468

469 **Table S1.** Quality filtered ARG hits in RefSoil genomes and plasmids. Information on quality  
470 scores and accession numbers for each ARG hit.

471

472 **Table S2.** RefSoil taxonomy table with plasmid and genome accession numbers.

473

Figure 1

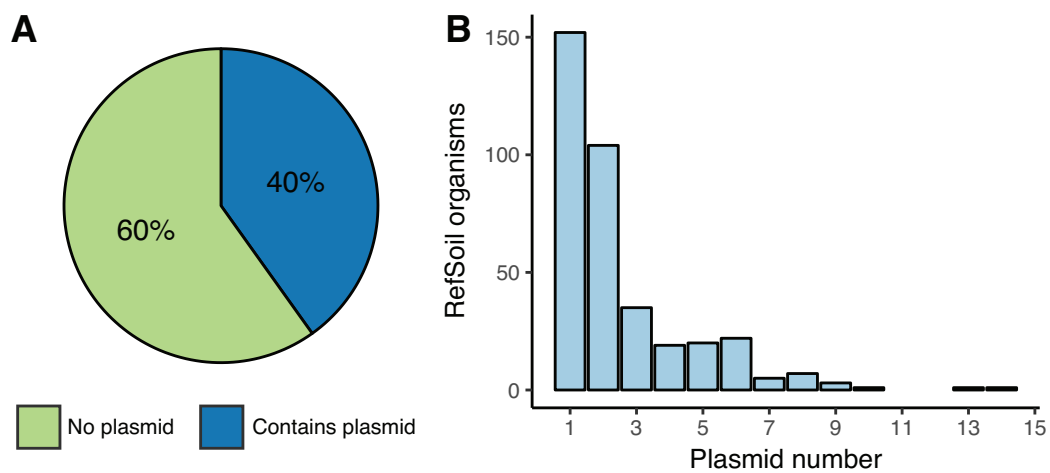

Figure 2

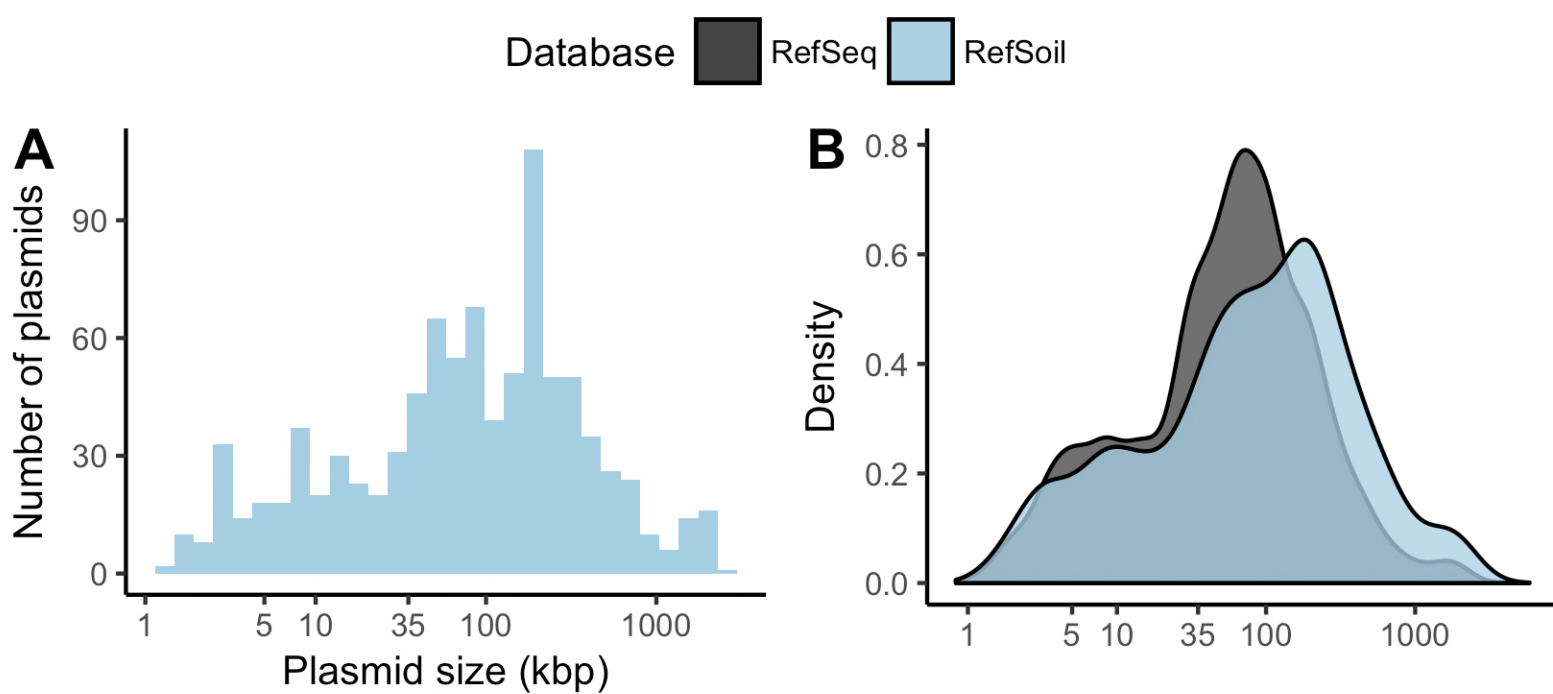

Figure 3

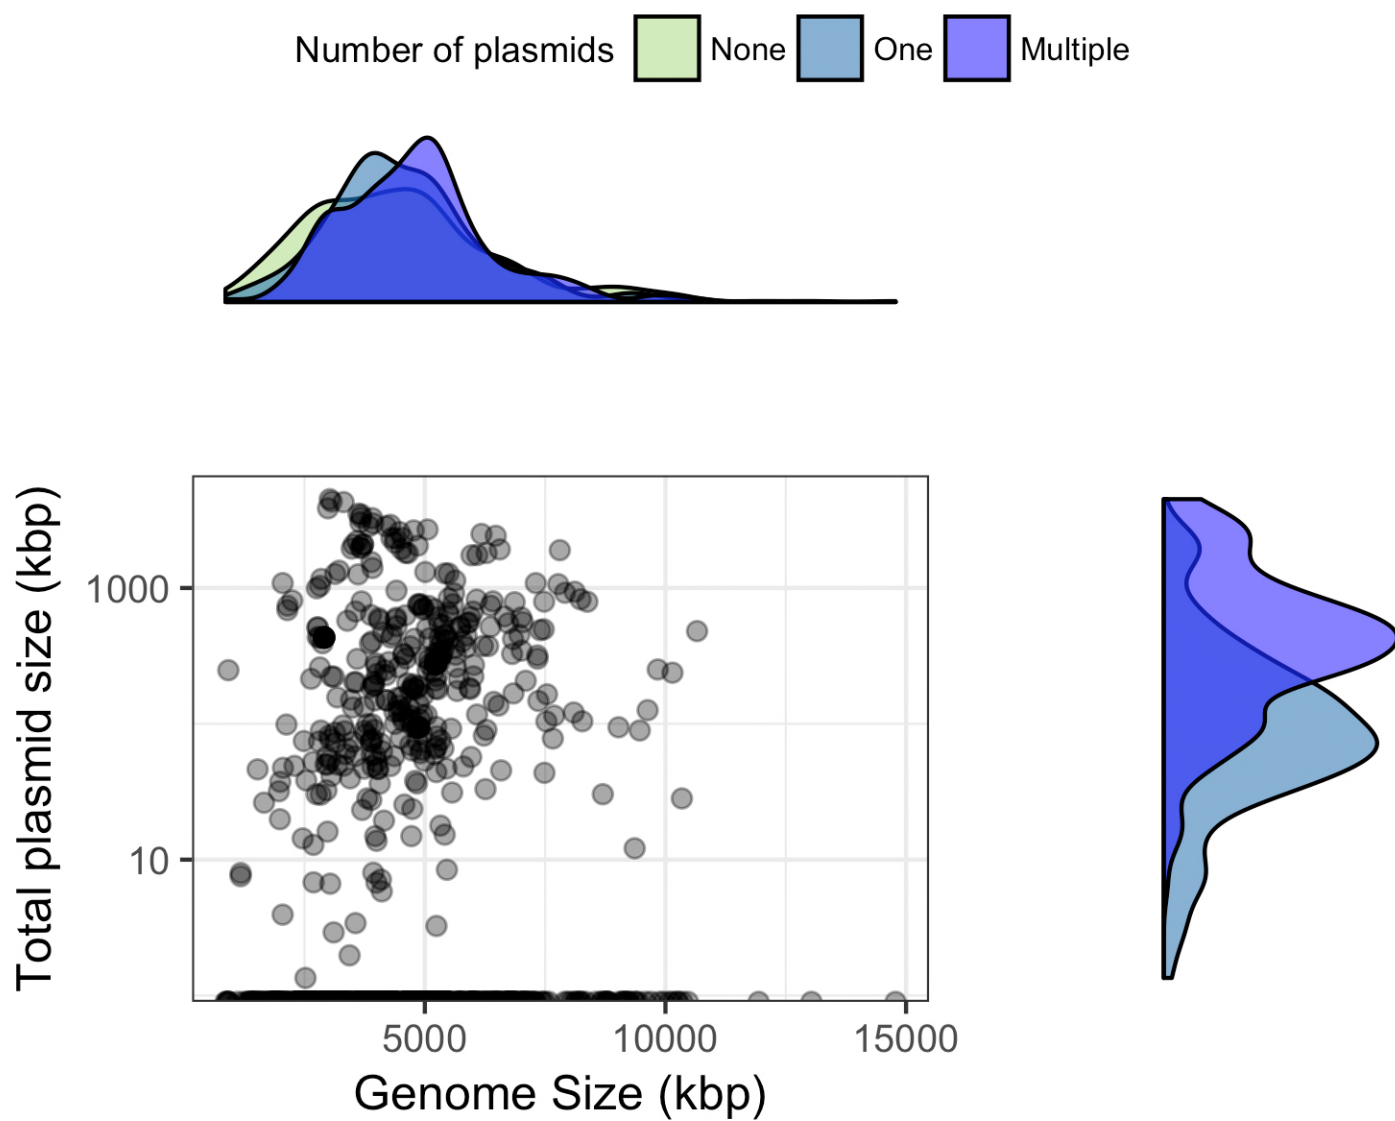

Figure 4

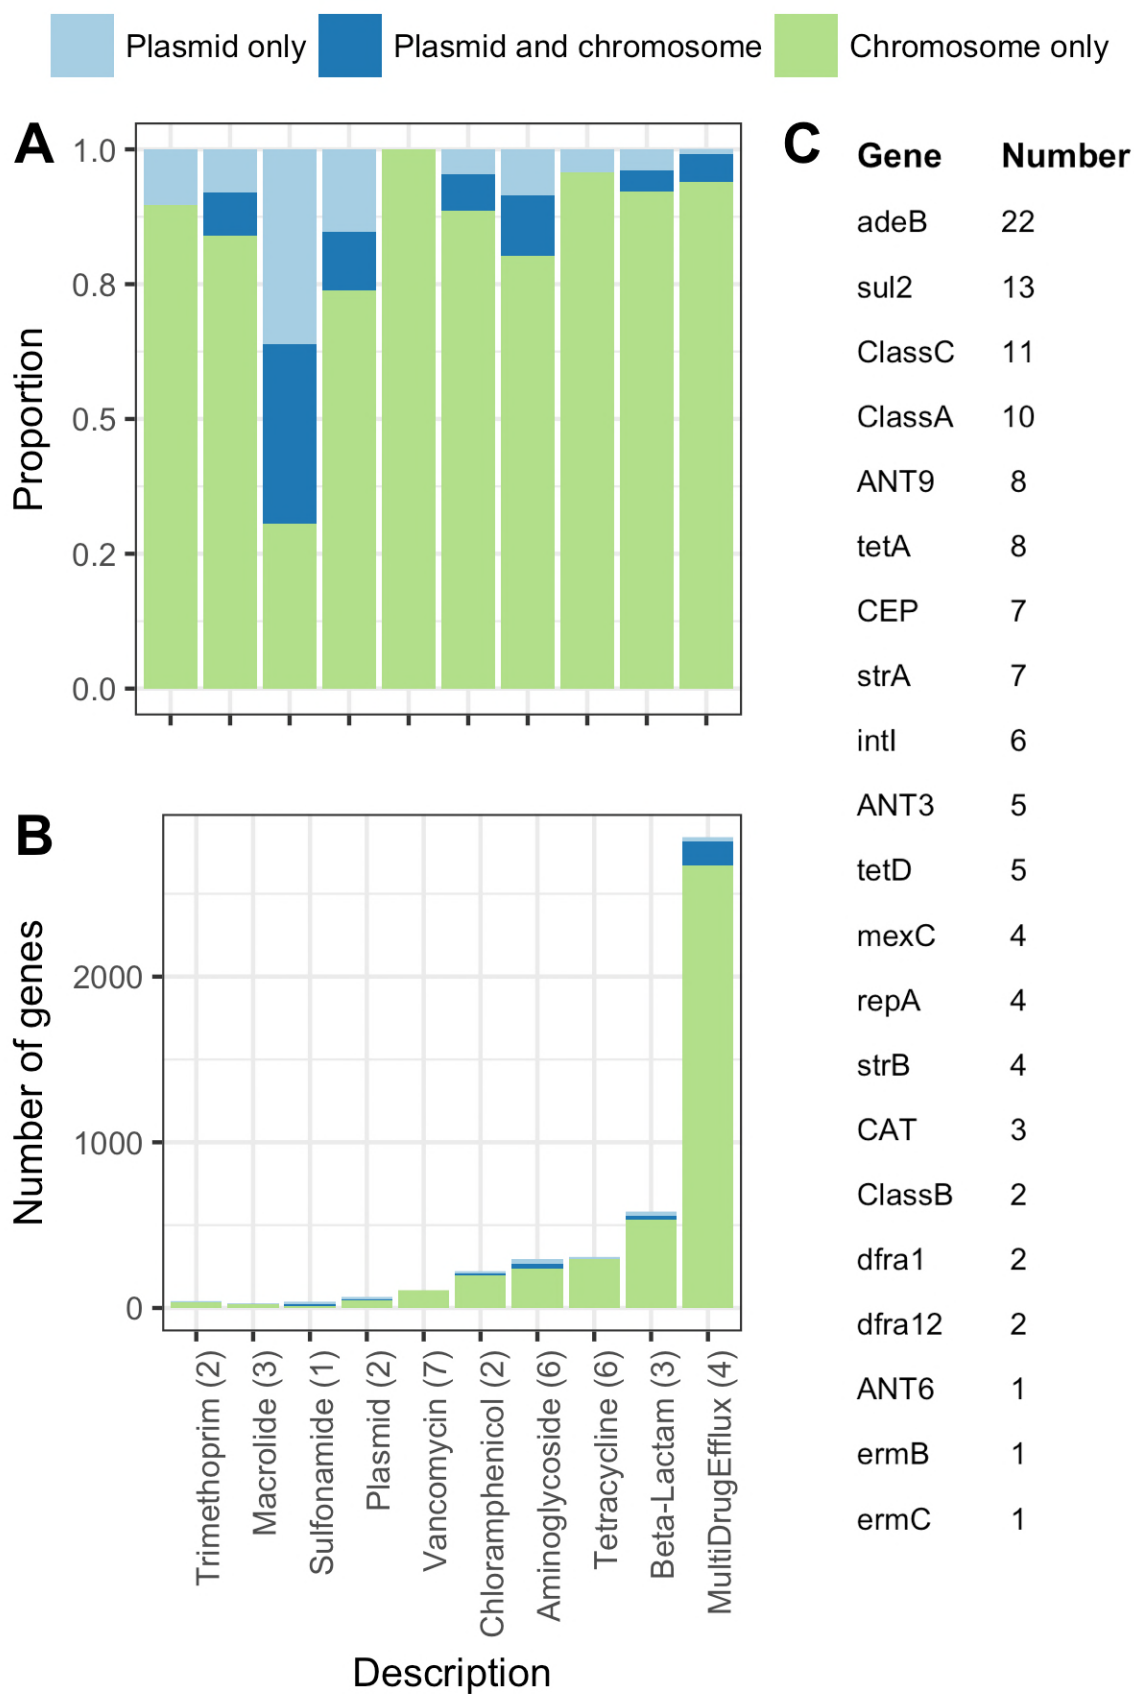

Figure 5

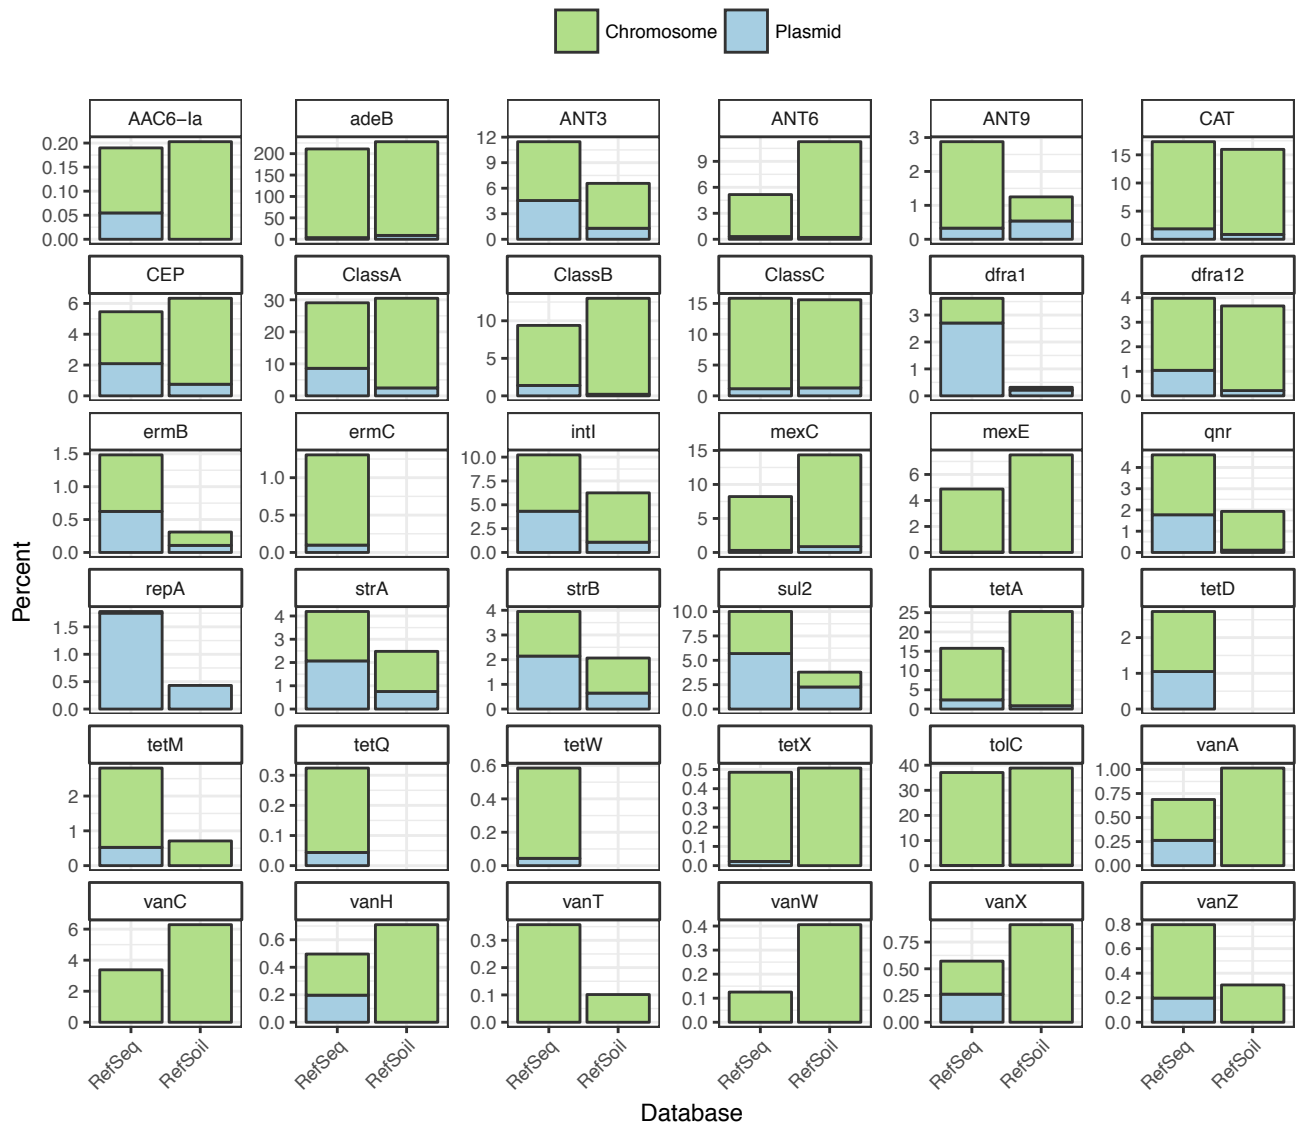

Source: https://www.biorxiv.org/content/10.1101/435107v1.full.pdf
